# Supplementary material
Source: publisher site journal article supplement (https://www.dovepress.com/article/486836)
Supplement: Supplementary file 1 [file get_supplementary_file.php]

**Table S1 Musculoskeletal health - Knee joint cohort**

| **Parameters** | **Categories** | **E-PR-01 HD** | | **E-PR-01 LD** | | **Placebo** | | **p-value** |
| --- | --- | --- | --- | --- | --- | --- | --- | --- |
| **Mean (SD)** | **95% CI** | **Mean (SD)** | **95% CI** | **Mean (SD)** | **95% CI** |  |
| **MSK-HQ scores - Knee joint cohort** | **N** | 30 | | 25 | | 30 | |  |
| **Day 0** | 23.23 (3.77) | (21.83, 24.64) | 24.40 (3.35) | (23.02, 25.78) | 24.23 (3.17) | (24.23, 25.42) | a0.3861 |
| **Day 30** | 28.67 (4.80) | (26.87, 30.46) | 27.52 (3.60) | (26.04, 29.00) | 25.27 (5.25) | (23.31, 27.23) | a0.0196 |
| **Change from baseline at day 30** | 5.43 (4.28) | (3.83, 7.03) | 3.12 (3.54) | (1.66, 4.58) | 1.03 (3.81) | (-0.39, 2.46) | b0.0004 |
| **#p value vs placebo** | 0.0002 | | 0.0822 | |  | |  |
| **Day 60** | 30.60 (7.43) | (27.83, 33.37) | 28.20 (9.00) | (24.49, 31.91) | 25.13 (7.22) | (22.44, 27.83) | a0.0302 |
| **Change from baseline at day 60** | 7.37 (7.20) | (4.68, 10.06) | 3.80 (9.73) | (-0.22, 7.82) | 0.90 (6.47) | (-1.52, 3.32) | b0.0140 |
| **#p value vs placebo** | 0.0069 | | 0.2679 | |  | |  |
| **Day 90** | 37.33 (4.23) | (35.75, 38.91) | 35.32 (4.66) | (33.40, 37.24) | 25.37 (6.58) | (22.91, 27.83) | a<0.0001 |
| **Change from baseline at day 90** | 14.10 (4.04) | (12.59, 15.61) | 10.92 (3.73) | (9.38, 12.46) | 1.13 (4.48) | (-0.67, 2.94) | b<0.0001 |
| **#p value vs placebo** | <0.0001 | | <0.0001 | |  | |  |

**Notes:** ap-values were calculated using ANOVA Test (A)

bp-values were calculated using Analysis of Covariance (ANCOVA) with treatment as factor and baseline as covariate

#p-values were calculated by comparing each treatment group to the placebo group using Dunnett’s T-test with ANCOVA

**Abbreviations:** CI; Confidence interval, MSK-HQ; Musculoskeletal - Health Questionnaire, N; Number of participants, SD; Standard deviation

**Table S2 Musculoskeletal health - Low back cohort**

| **Parameters** | **Categories** | **E-PR-01 HD** | | **E-PR-01 LD** | | **Placebo** | | **p-value** |
| --- | --- | --- | --- | --- | --- | --- | --- | --- |
| **Mean (SD)** | **95% CI** | **Mean (SD)** | **95% CI** | **Mean (SD)** | **95% CI** |  |
| **MSK-HQ - Low back cohort** | **N** | 22 | | 22 | | 23 | |  |
| **Day 0** | 24.09 (2.43) | (23.01, 25.17) | 24.23 (3.28) | (22.77, 25.68) | 23.70 (3.08) | (22.36, 25.03) | a0.8212 |
| **Day 30** | 29.27 (3.93) | (27.53, 31.02) | 28.27 (5.27) | (25.94, 30.61) | 25.65 (5.20) | (23.40, 27.90) | a0.0407 |
| **Change from baseline at day 30** | 5.18 (3.86) | (3.47, 6.89) | 4.05 (3.39) | (2.54, 5.55) | 1.96 (3.84) | (0.29, 3.62) | b0.0185 |
| **#p value vs placebo** | 0.0106 | | 0.1247 | |  | |  |
| **Day 60** | 34.23 (2.98) | (32.91, 35.55) | 30.95 (5.79) | (28.39, 33.52) | 26.70 (6.97) | (23.68, 29.71) | a0.0001 |
| **Change from baseline at day 60** | 10.14 (3.23) | (8.71, 11.57) | 6.73 (4.21) | (4.86, 8.59) | 3.00 (5.44) | (0.65, 5.35) | b<0.0001 |
| **#p value vs placebo** | <0.0001 | | 0.0143 | |  | |  |
| **Day 90** | 37.32 (3.11) | (35.94, 38.70) | 33.95 (4.61) | (31.91, 36.00) | 26.78 (7.71) | (23.45, 30.12) | a<0.0001 |
| **Change from baseline at day 90** | 13.23 (3.46) | (11.69, 14.76) | 9.73 (4.19) | (7.87, 11.58) | 3.09 (6.40) | (0.32, 5.86) | b<0.0001 |
| **#p value vs placebo** | <0.0001 | | <0.0001 | |  | |  |

**Notes:** ap-values were calculated using ANOVA Test (A)

bp-values were calculated using Analysis of Covariance (ANCOVA) with treatment as factor and baseline as covariate

#p-values were calculated by comparing each treatment group to the placebo group using Dunnett’s T-test with ANCOVA

**Abbreviations:** CI; Confidence interval, MSK-HQ; Musculoskeletal - Health Questionnaire, N; Number of participants, SD; Standard deviation

**Table S3 Active flexion of index joint**

| **Parameters** | **Categories** | **E-PR-01 HD** | | **E-PR-01 LD** | | **Placebo** | | **p-value** |
| --- | --- | --- | --- | --- | --- | --- | --- | --- |
| **Mean (SD)** | **95% CI** | **Mean (SD)** | **95% CI** | **Mean (SD)** | **95% CI** |  |
| **Active flexion (degrees)** | **N** | 52 | | 47 | | 53 | |  |
| **Day 0** | 110.26 (20.83) | (104.46, 116.06) | 105.31 (24.38) | (98.15, 112.47) | 106.89 (23.80) | (100.33, 113.45) | a0.5478 |
| **Day 90** | 115.44 (20.39) | (109.65, 121.24) | 108.89 (24.42) | (101.55, 116.22) | 107.47 (22.65) | (101.23, 113.72) | a0.1686 |
| **Change from baseline at day 90** | 4.84 (6.09) | (3.11, 6.57) | 3.93 (4.28) | (2.65, 5.22) | 0.59 (4.94) | (-0.77, 1.95) | b<0.0001 |
| **#p value vs placebo** | <0.0001 | | 0.0037 | |  | |  |

**Notes:** ap-values were calculated using ANOVA Test (A)

bp-values were calculated using Analysis of Covariance (ANCOVA) with treatment as factor and baseline as covariate

#p-values were calculated by comparing each treatment group to the placebo group using Dunnett’s T-test with ANCOVA

**Abbreviations:** CI; Confidence interval, N; Number of participants, SD; Standard deviation

**Table S4 Passive flexion of index joint**

| **Parameters** | **Categories** | **E-PR-01 HD** | | **E-PR-01 LD** | | **Placebo** | | **p-value** |
| --- | --- | --- | --- | --- | --- | --- | --- | --- |
| **Mean (SD)** | **95% CI** | **Mean (SD)** | **95% CI** | **Mean (SD)** | **95% CI** |  |
| **Passive flexion (degrees)** | **N** | 52 | | 47 | | 53 | |  |
| **Day 0** | 114.32 (19.19) | (108.97, 119.66) | 110.18 (22.68) | (103.53, 116.84) | 111.25 (22.90) | (104.93, 117.56) | a0.6101 |
| **Day 90** | 118.47 (19.15) | (113.03, 123.92) | 112.57 (23.75) | (105.43, 119.70) | 110.48 (22.35) | (104.33, 116.64) | a0.1628 |
| **Change from baseline at day 90** | 3.79 (6.30) | (2.00, 5.58) | 2.71 (4.53) | (1.35, 4.07) | -0.76 (5.78) | (-2.35, 0.83) | b0.0001 |
| **#p value vs placebo** | <0.0001 | | 0.0059 | |  | |  |

**Notes:** ap-values were calculated using ANOVA Test (A)

bp-values were calculated using Analysis of Covariance (ANCOVA) with treatment as factor and baseline as covariate

#p-values were calculated by comparing each treatment group to the placebo group using Dunnett’s T-test with ANCOVA

**Abbreviations:** CI; Confidence interval, N; Number of participants, SD; Standard deviation

**Table S5 Summary of Rescue Medication Consumption**

| **Visit** | **RM Consumed** | **E-PR-01 HD (N=52)** | **E-PR-01 LD (N=47)** | **Placebo (N=53)** | **P-value** |
| --- | --- | --- | --- | --- | --- |
| Day 90 | Yes | 31 (59.61%) | 31 (65.96%) | 46 (86.79%) | 0.0138(C) |
| No | 19 (36.53%) | 14 (29.79%) | 7 (13.21%) |  |

**Notes:** P-values have been calculated using Chi-Square test (C)

**Abbreviations:** N; Number of participants, RM; Rescue medication

**Table S6 Safety Outcomes**

| **Parameters** | **Categories** | **E-PR-01 HD** | | **E-PR-01 LD** | | **Placebo** | | **p-value** |
| --- | --- | --- | --- | --- | --- | --- | --- | --- |
| **Mean (SD)** | **95% CI** | **Mean (SD)** | **95% CI** | **Mean (SD)** | **95% CI** |  |
| **Pulse rate (beats/min)** | **N** | 53 | | 50 | | 54 | |  |
| **Day 0** | 76.28 (5.78) | (74.69, 77.88) | 76.86 (5.36) | (75.34, 78.38) | 76.85 (6.20) | (75.16, 78.54) | a0.8427 |
| **Day 7** | 75.96 (6.35) | (74.21, 77.71) | 76.73 (5.70) | (75.10, 78.37) | 77.15 (6.17) | (75.45, 78.85) | a0.5961 |
| **Change from baseline at day 7** | -0.32 (5.76) | (-1.91, 1.27) | -0.14 (6.34) | (-1.96, 1.68) | 0.32 (5.60) | (-1.22, 1.86) | b0.6806 |
| **#p value vs placebo** | 0.5863 | | 0.8784 | |  | |  |
| **Day 30** | 77.12 (5.95) | (75.46, 78.77) | 76.34 (7.50) | (74.14, 78.54) | 76.30 (6.89) | (74.40, 78.20) | a0.7906 |
| **Change from baseline at day 30** | 0.90 (5.69) | (-0.68, 2.49) | -0.49 (7.70) | (-2.75, 1.77) | -0.53 (6.16) | (-2.23, 1.17) | b0.5429 |
| **#p value vs placebo** | 0.5155 | | 0.9992 | |  | |  |
| **Day 90** | 77.54 (5.70) | (75.92, 79.16) | 78.04 (6.76) | (76.01, 80.08) | 77.00 (6.90) | (75.10, 78.90) | a0.7281 |
| **Change from baseline at day 90** | 1.24 (7.01) | (-0.75, 3.23) | 1.40 (8.03) | (-1.01, 3.81) | 0.17 (7.01) | (-1.76, 2.10) | b0.6669 |
| **#p value vs placebo** | 0.7853 | | 0.587 | |  | |  |
| **Systolic Blood Pressure (mmHg)** | **Day 0** | 121.51 (5.86) | (119.90, 123.12) | 122.02 (5.17) | (120.55, 123.49) | 120.13 (6.02) | (118.49, 121.77) | a0.2166 |
| **Day 7** | 119.91 (5.73) | (118.33, 121.48) | 120.94 (5.58) | (119.33, 122.54) | 120.34 (6.06) | (118.67, 122.01) | a0.6671 |
| **Change from baseline at day 7** | -1.60 (6.51) | (-3.40, 0.19) | -1.08 (5.33) | (-2.61, 0.45) | 0.25 (6.30) | (-1.49, 1.98) | b0.5514 |
| **#p value vs placebo** | 0.4726 | | 0.9543 | |  | |  |
| **Day 30** | 121.44 (5.00) | (120.05, 122.83) | 121.72 (6.06) | (119.94, 123.50) | 121.53 (6.14) | (119.84, 123.22) | a0.9698 |
| **Change from baseline at day 30** | 0.10 (7.76) | (-2.06, 2.26) | -0.51 (6.77) | (-2.50, 1.48) | 1.43 (7.67) | (-0.68, 3.55) | b0.9679 |
| **#p value vs placebo** | 0.9537 | | 0.9885 | |  | |  |
| **Day 90** | 120.36 (6.68) | (118.46, 122.26) | 121.82 (6.48) | (119.88, 123.77) | 122.15 (5.99) | (120.50, 123.80) | a0.3269 |
| **Change from baseline at day 90** | -0.80 (7.48) | (-2.93, 1.33) | -0.38 (6.33) | (-2.28, 1.52) | 2.06 (7.00) | (0.13, 3.99) | b0.1858 |
| **#p value vs placebo** | 0.1208 | | 0.5639 | |  | |  |
| **Diastolic Blood Pressure (mmHg)** | **Day 0** | 76.70 (5.01) | (75.32, 78.08) | 76.74 (4.65) | (75.42, 78.06) | 76.24 (5.59) | (74.71, 77.77) | a0.8560 |
| **Day 7** | 75.98 (5.52) | (74.46, 77.50) | 76.51 (5.42) | (74.95, 78.07) | 77.0 (4.81) | (75.69, 78.35) | a0.5975 |
| **Change from baseline at day 7** | -0.72 (5.43) | (-2.21, 0.78) | -0.24 (5.36) | (-1.78, 1.29) | 0.85 (6.28) | (-0.88, 2.58) | b0.4114 |
| **#p value vs placebo** | 0.3125 | | 0.656 | |  | |  |
| **Day 30** | 77.33 (5.48) | (75.80, 78.85) | 76.89 (5.34) | (75.33, 78.46) | 76.45 (5.44) | (74.95, 77.95) | a0.7115 |
| **Change from baseline at day 30** | 0.69 (6.33) | (-1.07, 2.45) | -0.11 (6.60) | (-2.04, 1.83) | 0.28 (5.61) | (-1.26, 1.83) | b0.7583 |
| **#p value vs placebo** | 0.6998 | | 0.982 | |  | |  |
| **Day 90** | 75.96 (5.65) | (74.35, 77.57) | 77.56 (5.08) | (76.03, 79.08) | 76.45 (5.47) | (74.94, 77.96) | a0.3467 |
| **Change from baseline at day 90** | -0.62 (5.33) | (-2.13, 0.89) | 0.73 (5.81) | (-1.01, 2.48) | 0.28 (6.21) | (-1.43, 1.99) | b0.3471 |
| **#p value vs placebo** | 0.7257 | | 0.6284 | |  | |  |
| **SGOT (U/L)** | **Day 0** | 46.27 (31.53) | (37.58, 54.96) | 40.24 (11.58) | (36.91, 43.56) | 41.48 (13.87) | (37.69, 45.27) | a0.3104 |
| **Day 90** | 42.28 (15.00) | (38.02, 46.54) | 39.41 (10.53) | (36.21, 42.61) | 42.82 (14.79) | (38.70, 46.93) | a0.4408 |
| **Change from baseline at day 90** | -3.83 (33.02) | (-13.21, 5.56) | -1.25 (10.44) | (-4.43, 1.92) | 1.84 (15.17) | (-2.39, 6.06) | b0.4678 |
| **#p value vs placebo** | 0.8076 | | 0.3645 | |  | |  |
| **SGPT (U/L)** | **Day 0** | 49.26 (19.47) | (43.89, 54.62) | 46.98 (19.80) | (41.29, 52.67) | 50.11 (22.12) | (44.07, 56.15) | a0.7302 |
| **Day 90** | 42.30 (21.75) | (36.12, 48.48) | 42.53 (14.03) | (38.27, 46.80) | 45.01 (21.54) | (39.02, 51.01) | a0.7452 |
| **Change from baseline at day 90** | -6.29 (28.69) | (-14.44, 1.87) | -4.83 (15.88) | (-9.65, 0.00) | -4.21 (23.54) | (-10.77, 2.34) | b0.7788 |
| **#p value vs placebo** | 0.7246 | | 0.8373 | |  | |  |
| **ALP (U/L)** | **Day 0** | 94.83 (23.55) | (87.89, 100.87) | 92.48 (21.16) | (86.40, 98.56) | 97.67 (25.80) | (90.63, 104.71) | a0.5286 |
| **Day 90** | 82.29 (24.75) | (75.25, 89.32) | 85.62 (19.36) | (79.73, 91.50) | 90.24 (24.22) | (83.49, 96.98) | a0.2203 |
| **Change from baseline at day 90** | -11.05 (23.25) | (-17.66, -4.44) | -6.21 (19.61) | (-12.17, -0.25) | -7.19 (23.75) | (-13.80, -0.58) | b0.3171 |
| **#p value vs placebo** | 0.2421 | | 0.8861 | |  | |  |
| **Serum creatinine (mg/dl)** | **Day 0** | 0.67 (0.20) | (0.62, 0.73) | 0.70 (0.21) | (0.64, 0.76) | 0.80 (0.25) | (0.74, 0.87) | a0.0068 |
| **Day 90** | 0.77 (0.25) | (0.70, 0.84) | 0.75 (0.21) | (0.69, 0.81) | 0.74 (0.20) | (0.69, 0.80) | a0.8834 |
| **Change from baseline at day 90** | 0.09 (0.19) | (0.03, 0.14) | 0.06 (0.17) | (0.01, 0.11) | -0.06 (0.21) | (-0.12, -0.00) | b0.0172 |
| **#p value vs placebo** | 0.0119 | | 0.0703 | |  | |  |

**Notes:** ap-values were calculated using ANOVA Test (A)
bp-values were calculated using Analysis of Covariance (ANCOVA) with treatment as factor and baseline as covariate
#p-values were calculated by comparing each treatment group to the placebo group using Dunnett’s T-test with ANCOVA

**Abbreviations:** ALP; Alkaline phosphatase, CI; Confidence interval, N; Number of participants, SD; Standard deviation, SGOT; serum glutamic oxaloacetic transaminase, SGPT; serum glutamate pyruvate transaminase

**Table S7 Adverse events**

| **Adverse Event** | **E-PR-01 HD (N=53)** | **E-PR-01 LD (N=50)** | **Placebo (N=54)** | **Overall (N=157)** |
| --- | --- | --- | --- | --- |
| Accidental injury fall at home | 1 (1.89%) | 0 (0.00%) | 0 (0.00%) | 1 (0.64%) |
| Acidity | 4 (7.55%) | 6 (12.00%) | 8 (14.81%) | 18 (11.46%) |
| Common cold | 0 (0.00%) | 0 (0.00%) | 1 (1.85%) | 1 (0.64%) |
| Drowsiness | 1 (1.89%) | 0 (0.00%) | 0 (0.00%) | 1 (0.64%) |
| Dry cough | 1 (1.89%) | 0 (0.00%) | 0 (0.00%) | 1 (0.64%) |
| Headache | 1 (1.89%) | 0 (0.00%) | 0 (0.00%) | 1 (0.64%) |
| Increase in SGOT and/or SGPT level | 4 (7.54%) | 3 (6.00%) | 3 (5.56%) | 10 (6.36%) |
| Skin Allergy/Irritation/Rashes | 3 (5.66%) | 0 (0.00%) | 1 (1.85%) | 4 (2.54%) |

**Notes:** Percentages were calculated using the respective column header count as the denominator.
**Abbreviations:** N; Number of participants
